# Supplementary material
Source: Oxford University Press journal article supplement (doi:10.1093/g3journal_jkac110)
Supplement: jkac110_supplementary_figure_s1.pdf [file jkac110_supplementary_figure_s1.pdf]

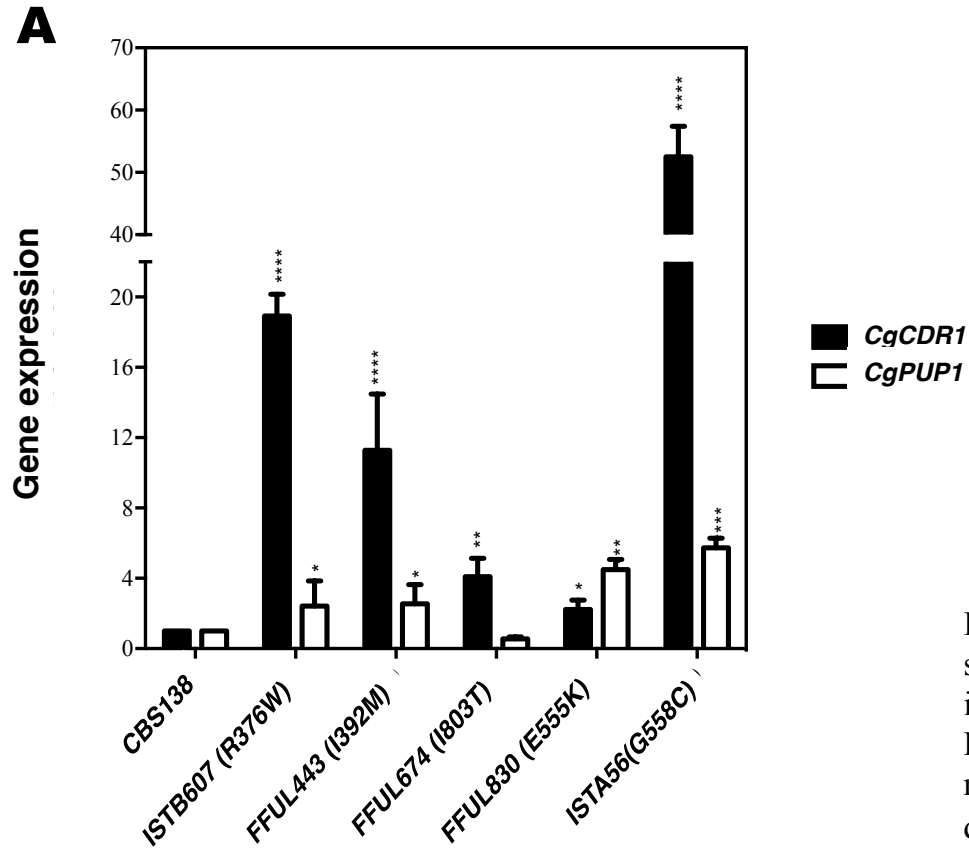

**Figure S1.** Expression of *CgCDR1* and of *CgPUP1* in the azole-susceptible strain CBS138 and in the azole-resistant strains identified in our phenotypic screening, including FFUL443 and FFUL674. In this experiment the cells were cultivated in RPMI medium, harvested in mid-exponential phase and then used for downstream analysis as detailed in materials and methods. The level of expression registered in the CBS138 was set at 1 and the other values compared with that. The transcript levels of *CgRDN5* were used as internal control
