# Supplementary material
Source: Oxford University Press journal article supplement (doi:10.1093/g3journal_jkac110)
Supplement: jkac110_supplementary_figure_s2.pdf [file jkac110_supplementary_figure_s2.pdf]

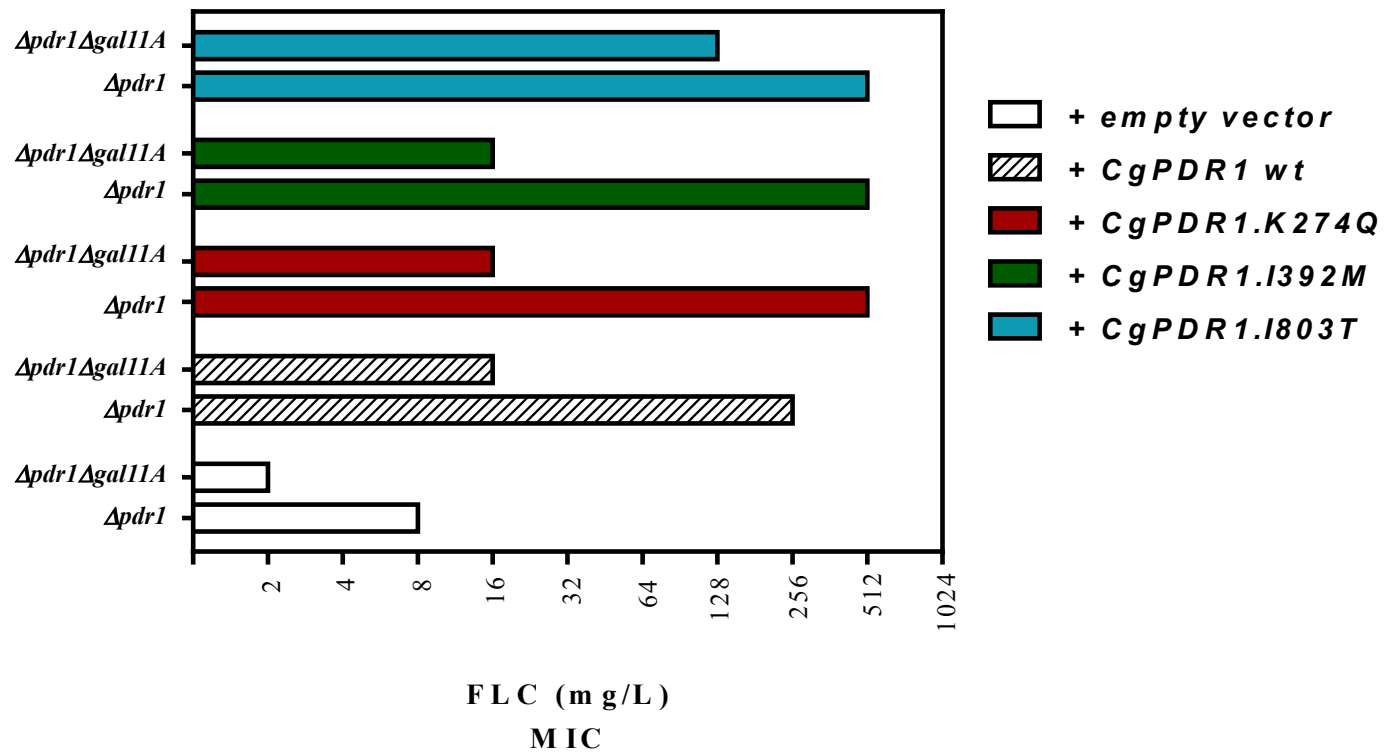

Supplementary figure S2. MIC for fluconazole in *C. glabrata*  $\Delta pdr1$  or  $\Delta pdr1\Delta gal11A$  cells expressing different versions of the *CgPDR1* allele.
